# Supplementary material for: Migrating and non-migrating tides observed in the stratosphere from FORMOSAT-3/COSMIC temperature retrievals
Source: Copernicus journal article supplement (doi:10.5194/angeo-38-421-2020), 2020-03-31
Supplement: Supplementary file 1 [file angeo-38-421-2020-supplement.zip]

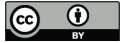

## *Supplement of*

# **Migrating and non-migrating tides observed in the stratosphere from FORMOSAT-3/COSMIC temperature retrievals**

**Uma Das et al.**

*Correspondence to:* Uma Das ([uma@iiitkalyani.ac.in](mailto:uma@iiitkalyani.ac.in))

- [angeo-38-421-2020-supplement-title-page.pdf](#)
- [FigS1.eps](#)
- [Supp.txt](#)

The copyright of individual parts of the supplement might differ from the CC BY 4.0 License.
